# Supplementary material for: “Pushing and pulling” the equilibrium through bubble mediated reactive separation for ethyl acetate production
Source: Royal Society of Chemistry journal article supplement (doi:10.1039/c8re00328a), 2019-01-01
Supplement: c8re00328a1.pdf [file c8re00328a1.pdf]

## Supplementary information

Table 1 Properties of acetic acid and ethanol

| Properties         | Symbols  | Value   |         | Units             |
|--------------------|----------|---------|---------|-------------------|
| <b>Ethanol</b>     |          |         |         |                   |
| Density            | $\rho_a$ | 0.784   | At 25°C | g/cm <sup>3</sup> |
| Molecular mass     | Mw       | 46.07   |         | g/mol             |
| <b>Acetic acid</b> |          |         |         |                   |
| Molecular mass     | Mw       | 60.05   |         | g/mol             |
| Density            | $\rho_a$ | 0.982   | At 80°C | g/cm <sup>3</sup> |
| Viscosity          | $\mu_b$  | 0.00056 | At 80°C | Kg/m.sec          |

Table 2 Parameters for used for calculations

| Properties                            | Symbols  | Value                     |         | Units                  |
|---------------------------------------|----------|---------------------------|---------|------------------------|
| Molar volume of Ethanol bubbles       | $v_1$    | 36.1188                   |         | cm <sup>3</sup> /mol   |
| Molar volume of Acetic acid           | $v_2$    | 57.2996                   |         | cm <sup>3</sup> /mol   |
| Diffusion coefficient of EtOH in AcOH | $D_{ab}$ | $2.41269 \times 10^{-05}$ | At 25°C | cm <sup>2</sup> /sec   |
|                                       | $D_{ab}$ | $9.06571 \times 10^{-05}$ | At 80°C | cm <sup>2</sup> /sec   |
| Gravitational acceleration            | $g$      | 9.8                       |         | m/sec <sup>2</sup>     |
| Henry constant                        | Ha       | 0.7132                    |         | Pa m <sup>3</sup> /sec |
| Hatta number                          | $M_H$    | 4                         |         | ---                    |
| Enhancement factor                    | $E$      | 3.6686                    |         | ---                    |
| Infinite Enhancement factor           | $E_i$    | 14.988                    |         | ---                    |
